# Supplementary material
Source: PubMed Central journal article supplement (PMC9177523)

**Supplementary Table 1.** Genes included on the MSK-IMPACT panel.

|          |          |          |           |          |          |          |          |          |
|----------|----------|----------|-----------|----------|----------|----------|----------|----------|
| ABL1     | ACVR1    | AGO2     | AKT1      | AKT2     | AKT3     | ALK      | ALOX12B  | ANKRD11  |
| APC      | AR       | ARAF     | ARID1A    | ARID1B   | ARID2    | ARID5B   | ASXL1    | ASXL2    |
| ATM      | ATR      | ATRX     | AURKA     | AURKB    | AXIN1    | AXIN2    | AXL      | B2M      |
| BABAM1   | BAP1     | BARD1    | BBC3      | BCL10    | BCL2     | BCL2L1   | BCL2L11  | BCL6     |
| BCOR     | BIRC3    | BLM      | BMPR1A    | BRAF     | BRCA1    | BRCA2    | BRD4     | BRIP1    |
| BTK      | CALR     | CARD11   | CARM1     | CASP8    | CBFB     | CBL      | CCND1    | CCND2    |
| CCND3    | CCNE1    | CD274    | CD276     | CD79A    | CD79B    | CDC42    | CDC73    | CDH1     |
| CDK12    | CDK4     | CDK6     | CDK8      | CDKN1A   | CDKN1B   | CDKN2A   | CDKN2B   | CDKN2C   |
| CEBPA    | CENPA    | CHEK1    | CHEK2     | CIC      | CREBBP   | CRKL     | CRLF2    | CSDE1    |
| CSF1R    | CSF3R    | CTCF     | CTLA4     | CTNNB1   | CUL3     | CXCR4    | CYLD     | CYSLTR2  |
| DAXX     | DCUN1D1  | DDR2     | DICER1    | DIS3     | DNAJB1   | DNMT1    | DNMT3A   | DNMT3B   |
| DOT1L    | DROSHA   | DUSP4    | E2F3      | EED      | EGFL7    | EGFR     | EIF1AX   | EIF4A2   |
| EIF4E    | ELF3     | EP300    | EPAS1     | EPCAM    | EPHA3    | EPHA5    | EPHA7    | EPHB1    |
| ERBB2    | ERBB3    | ERBB4    | ERCC2     | ERCC3    | ERCC4    | ERCC5    | ERF      | ERG      |
| ERRFI1   | ESR1     | ETV1     | ETV6      | EZH1     | EZH2     | FAM123B  | FAM175A  | FAM46C   |
| FAM58A   | FANCA    | FANCC    | FAT1      | FBXW7    | FGF19    | FGF3     | FGF4     | FGFR1    |
| FGFR2    | FGFR3    | FGFR4    | FH        | FLCN     | FLT1     | FLT3     | FLT4     | FOXA1    |
| FOXL2    | FOXO1    | FOXP1    | FUBP1     | FYN      | GATA1    | GATA2    | GATA3    | GLI1     |
| GNA11    | GNAQ     | GNAS     | GPS2      | GREM1    | GRIN2A   | GSK3B    | H3F3A    | H3F3B    |
| H3F3C    | HGF      | HIST1H1C | HIST1H2BD | HIST1H3A | HIST1H3B | HIST1H3C | HIST1H3D | HIST1H3E |
| HIST1H3F | HIST1H3G | HIST1H3H | HIST1H3I  | HIST1H3J | HIST2H3C | HIST2H3D | HIST3H3  | HLA-A    |
| HLA-B    | HNF1A    | HOXB13   | HRAS      | ICOSLG   | ID3      | IDH1     | IDH2     | IFNGR1   |
| IGF1     | IGF1R    | IGF2     | IKBKE     | IKZF1    | IL10     | IL7R     | INHA     | INHBA    |
| INPP4A   | INPP4B   | INPPL1   | INSR      | IRF4     | IRS1     | IRS2     | JAK1     | JAK2     |
| JAK3     | JUN      | KDM5A    | KDM5C     | KDM6A    | KDR      | KEAP1    | KIT      | KLF4     |
| KMT2B    | KMT5A    | KNSTRN   | KRAS      | LATS1    | LATS2    | LMO1     | LYN      | MALT1    |
| MAP2K1   | MAP2K2   | MAP2K4   | MAP3K1    | MAP3K13  | MAP3K14  | MAPK1    | MAPK3    | MAPKAP1  |
| MAX      | MCL1     | MDC1     | MDM2      | MDM4     | MED12    | MEF2B    | MEN1     | MET      |
| MGA      | MITF     | MLH1     | MLL       | MLL2     | MLL3     | MPL      | MRE11A   | MSH2     |
| MSH3     | MSH6     | MSI1     | MSI2      | MST1     | MST1R    | MTOR     | MUTYH    | MYC      |
| MYCL1    | MYCN     | MYD88    | MYOD1     | NBN      | NCOA3    | NCOR1    | NEGR1    | NF1      |

|         |          |        |         |         |         |         |         |          |
|---------|----------|--------|---------|---------|---------|---------|---------|----------|
| NF2     | NFE2L2   | NFKBIA | NKX2-1  | NKX3-1  | NOTCH1  | NOTCH2  | NOTCH3  | NOTCH4   |
| NPM1    | NRAS     | NSD1   | NTHL1   | NTRK1   | NTRK2   | NTRK3   | NUF2    | NUP93    |
| PAK1    | PAK7     | PALB2  | PARK2   | PARP1   | PAX5    | PBRM1   | PDCD1   | PDCD1LG2 |
| PDGFRA  | PDGFRB   | PDPK1  | PGR     | PHOX2B  | PIK3C2G | PIK3C3  | PIK3CA  | PIK3CB   |
| PIK3CD  | PIK3CG   | PIK3R1 | PIK3R2  | PIK3R3  | PIM1    | PLCG2   | PLK2    | PMAIP1   |
| PMS1    | PMS2     | PNRC1  | POLD1   | POLE    | PPARG   | PPM1D   | PPP2R1A | PPP4R2   |
| PPP6C   | PRDM1    | PRDM14 | PREX2   | PRKAR1A | PRKCI   | PRKD1   | PTCH1   | PTEN     |
| PTP4A1  | PTPN11   | PTPRD  | PTPRS   | PTPRT   | RAB35   | RAC1    | RAC2    | RAD21    |
| RAD50   | RAD51    | RAD51C | RAD51L1 | RAD51L3 | RAD52   | RAD54L  | RAF1    | RARA     |
| RASA1   | RB1      | RBM10  | RECQL   | RECQL4  | REL     | RET     | RFWD2   | RHEB     |
| RHOA    | RICTOR   | RIT1   | RNF43   | ROS1    | RPS6KA4 | RPS6KB2 | RPTOR   | RRAGC    |
| RRAS    | RRAS2    | RTEL1  | RUNX1   | RXRA    | RYBP    | SDHA    | SDHAF2  | SDHB     |
| SDHC    | SDHD     | SESN1  | SESN2   | SESN3   | SETD2   | SF3B1   | SH2B3   | SH2D1A   |
| SHOC2   | SHQ1     | SLX4   | SMAD2   | SMAD3   | SMAD4   | SMARCA4 | SMARCB1 | SMARCD1  |
| SMO     | SMYD3    | SOCS1  | SOS1    | SOX17   | SOX2    | SOX9    | SPEN    | SPOP     |
| SPRED1  | SRC      | SRSF2  | STAG2   | STAT3   | STAT5A  | STAT5B  | STK11   | STK19    |
| STK40   | SUFU     | SUZ12  | SYK     | TAP1    | TAP2    | TBX3    | TCEB1   | TCF3     |
| TCF7L2  | TEK      | TERT   | TET1    | TET2    | TGFBR1  | TGFBR2  | TMEM127 | TMPRSS2  |
| TNFAIP3 | TNFRSF14 | TOP1   | TP53    | TP53BP1 | TP63    | TRAF2   | TRAF7   | TSC1     |
| TSC2    | TSHR     | U2AF1  | UPF1    | VEGFA   | VHL     | VTCN1   | WHSC1   | WHSC1L1  |
| WT1     | WWTR1    | XIAP   | XPO1    | XRCC2   | YAP1    | YES1    | ZFH3    | ZRSR2    |

**Supplementary Table 2.** Clinicopathological characteristics of the 22 patients with paired molecular comparison of type 1 and type 2 areas.

| Case # | Age | Sex | Surgey  | Tumor Size (cm) | LVI | Necrosis (%) | Furhman grade (predominant) | Furhman grade (highest) | WHO/ISUP grade (predominant) | WHO/ISUP grade (highest) | Mitosis/10 HPF | Type 1 (%) | Type 2 (%) | pT | Recurrence/Progression | F/u time (years) | Status |
|--------|-----|-----|---------|-----------------|-----|--------------|-----------------------------|-------------------------|------------------------------|--------------------------|----------------|------------|------------|----|------------------------|------------------|--------|
| RCJ_1  | 72  | M   | Partial | 2.9             | N   | 7            | 2                           | 2                       | 3                            | 3                        | 0              | 15         | 85         | 1A | NONE                   | 9.2              | NED    |
| RCJ_10 | 65  | M   | Total   | 14.8            | N   | 75           | 2                           | 2                       | 1                            | 2                        | 0              | 80         | 20         | 3A | DISTANT METS           | 2.6              | DOD    |
| RCJ_11 | 63  | M   | Partial | 3.4             | N   | 30           | 2                           | 3                       | 2                            | 3                        | 0              | 90         | 10         | 1A | NONE                   | 4.5              | NED    |
| RCJ_12 | 65  | M   | Partial | 2.5             | N   | 0            | 1                           | 3                       | 1                            | 2                        | 0              | 75         | 25         | 1A | NONE                   | 2.6              | NED    |
| RCJ_13 | 69  | M   | Total   | 5.3             | N   | 5            | 2                           | 3                       | 2                            | 3                        | 0              | 25         | 75         | 1B | NONE                   | 9.9              | DOC    |
| RCJ_14 | 63  | M   | Partial | 3               | N   | 5            | 2                           | 3                       | 2                            | 3                        | 0              | 10         | 90         | 1A | NONE                   | 9.7              | NED    |
| RCJ_15 | 71  | M   | Partial | 3.2             | N   | 5            | 2                           | 2                       | 2                            | 3                        | 0              | 80         | 20         | 1A | NONE                   | 11.1             | NED    |
| RCJ_16 | 77  | M   | Total   | 7.8             | N   | 85           | 1                           | 2                       | 2                            | 3                        | 0              | 70         | 30         | 2B | NONE                   | 9.6              | NED    |
| RCJ_17 | 68  | M   | Partial | 2.5             | N   | 5            | 1                           | 2                       | 2                            | 3                        | 0              | 90         | 10         | 1A | NONE                   | 9.0              | NED    |
| RCJ_18 | 75  | F   | Total   | 3.6             | Y   | 20           | 2                           | 2                       | 1                            | 2                        | 19             | 75         | 25         | 3B | DISTANT METS           | 2.9              | DOD    |
| RCJ_19 | 69  | M   | Partial | 4               | N   | 7            | 2                           | 3                       | 3                            | 3                        | 1              | 5          | 95         | 1A | DISTANT METS           | 7.4              | AWD    |
| RCJ_2  | 60  | M   | Partial | 3.7             | N   | 0            | 2                           | 2                       | 2                            | 3                        | 0              | 75         | 25         | 1A | NONE                   | 6.9              | NED    |
| RCJ_20 | 78  | M   | Total   | 6               | N   | 40           | 2                           | 3                       | 3                            | 3                        | 0              | 5          | 95         | 1B | NONE                   | 7.7              | NED    |
| RCJ_21 | 74  | M   | Total   | 6.4             | N   | 20           | 2                           | 3                       | 2                            | 3                        | 1              | 95         | 5          | 3A | NONE                   | 6.6              | NED    |
| RCJ_22 | 79  | M   | Total   | 7.5             | Y   | 5            | 3                           | 4                       | 3                            | 4                        | 0              | 2          | 98         | 3A | DISTANT METS           | 3.6              | DOD    |
| RCJ_3  | 69  | M   | Partial | 3.1             | N   | 0            | 2                           | 3                       | 2                            | 3                        | 0              | 35         | 65         | 1A | NONE                   | 6.9              | NED    |
| RCJ_4  | 83  | M   | Partial | 8.5             | N   | 40           | 2                           | 3                       | 2                            | 3                        | 0              | 85         | 15         | 3A | NONE                   | 6.4              | NED    |
| RCJ_5  | 74  | M   | Partial | 17              | N   | 0            | 2                           | 3                       | 2                            | 3                        | 1              | 10         | 90         | 2B | NONE                   | 6.3              | NED    |
| RCJ_6  | 53  | M   | Partial | 4.8             | N   | 0            | 2                           | 2                       | 2                            | 2                        | 2              | 60         | 40         | 1B | NONE                   | 3.8              | NED    |
| RCJ_7  | 73  | M   | Total   | 4.7             | N   | 40           | 2                           | 3                       | 2                            | 3                        | 0              | 65         | 35         | 1B | NONE                   | 9.6              | NED    |
| RCJ_8  | 69  | M   | Partial | 9.5             | N   | 30           | 1                           | 2                       | 1                            | 2                        | 0              | 90         | 10         | 2A | NONE                   | 7.6              | NED    |
| RCJ_9  | 64  | M   | Partial | 1.8             | N   | 0            | 1                           | 2                       | 1                            | 2                        | 0              | 75         | 25         | 1A | NONE                   | 7.5              | NED    |

**Supplementary Figure 1.** Distribution of fraction of copy number altered (FCNAg) compared between type 1 and type 2 areas.

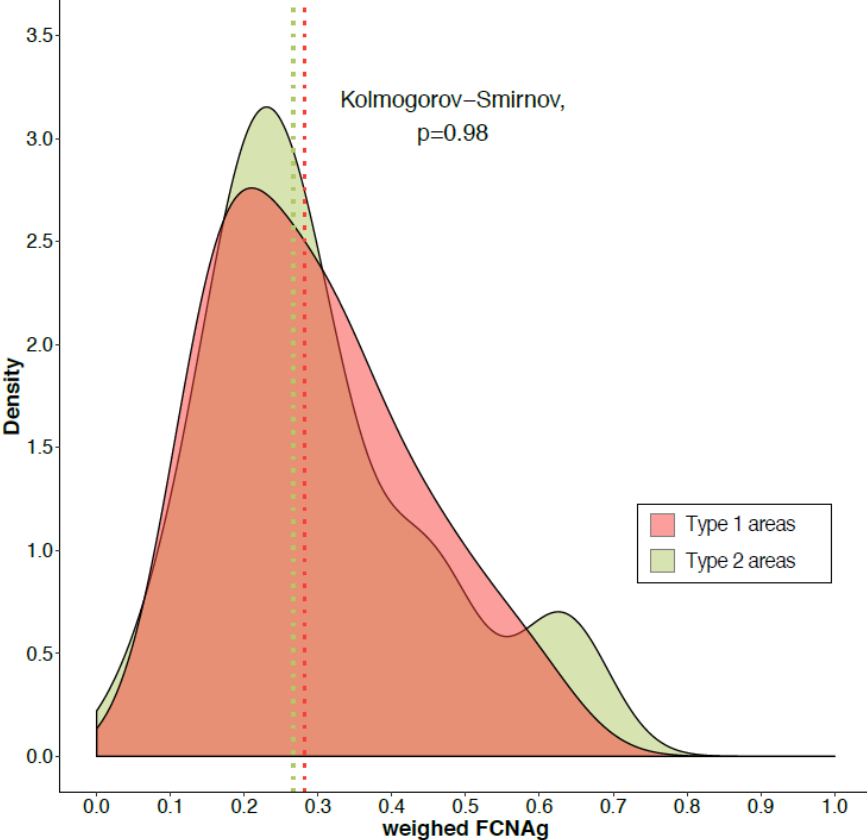

Supplement: NIHMS1760574-supplement-Supplementary_Tables_and_Figure_1.pdf [file NIHMS1760574-supplement-Supplementary_Tables_and_Figure_1.pdf]
